# Supplementary material
Source: PubMed Central journal article supplement (PMC8367268)
Supplement: boe-12-7-4147-s001.pdf [file boe-12-7-4147-s001.pdf]

## Hemodynamics of the sternocleidomastoid measured with frequency domain near-infrared spectroscopy towards non-invasive monitoring during mechanical ventilation: supplement

**RAEEF ISTFAN,<sup>1</sup>  CARLOS A. GÓMEZ,<sup>1</sup> MATTHEW APPLGATE,<sup>1</sup> DMITRY ROZENBERG,<sup>2</sup> W. DARLENE REID,<sup>3,4,5</sup> AND DARREN ROBLYER<sup>1,\*</sup>**

<sup>1</sup>*Department of Biomedical Engineering, Boston University, Boston, MA 02125, USA*

<sup>2</sup>*Department of Medicine, Respiriology and Lung Transplantation, University Health Network, University of Toronto, Toronto, ON, Canada*

<sup>3</sup>*Department of Physical Therapy, University of Toronto, Toronto ON, Canada*

<sup>4</sup>*Interdepartmental Division of Critical Care Medicine, University of Toronto, Toronto, ON, Canada*

<sup>5</sup>*KITE - Toronto Rehabilitation Institute, University Health Network, Toronto, ON, Canada*

\**roblyer@bu.edu*

---

This supplement published with The Optical Society on 15 June 2021 by The Authors under the terms of the [Creative Commons Attribution 4.0 License](https://creativecommons.org/licenses/by/4.0/) in the format provided by the authors and unedited. Further distribution of this work must maintain attribution to the author(s) and the published article's title, journal citation, and DOI.

Supplement DOI: <https://doi.org/10.6084/m9.figshare.14747964>

Parent Article DOI: <https://doi.org/10.1364/BOE.430423>

## Supplementary Information:

**Table S1:** Healthy volunteer data measured at baseline. All optical values calculated using FD data.

| Subject       | Sex         | Max Force (N) | Baseline $\mu_a$ ( $\text{mm}^{-1}$ ) |              | Baseline $\mu_s'$ ( $\text{mm}^{-1}$ ) |             | Baseline Chromophores ( $\mu\text{M}$ ) |               |               |                  | Skin+Lipid Layer (mm) | DPF         |             |
|---------------|-------------|---------------|---------------------------------------|--------------|----------------------------------------|-------------|-----------------------------------------|---------------|---------------|------------------|-----------------------|-------------|-------------|
|               |             |               | 730 nm                                | 850 nm       | 730 nm                                 | 850 nm      | Oxy (Hb+Mb)                             | Deoxy (Hb+Mb) | Total (Hb+Mb) | StO <sub>2</sub> | Ultrasound            | 730 nm      | 850 nm      |
| 1             | M           | 103           | 0.026                                 | 0.035        | 0.62                                   | 0.55        | 102.5                                   | 42.6          | 145.1         | 70.6             | 3.78                  | 3.57        | 2.93        |
| 2             | M           | 95            | 0.032                                 | 0.041        | 0.57                                   | 0.49        | 119.1                                   | 55.2          | 174.3         | 68.3             | 3.48                  | 3.17        | 2.46        |
| 3             | M           | 94            | 0.034                                 | 0.041        | 0.53                                   | 0.46        | 114.3                                   | 64.1          | 178.4         | 64.0             | 3.40                  | 2.94        | 2.43        |
| 4             | M           | 84            | 0.042                                 | 0.059        | 0.49                                   | 0.38        | 189.3                                   | 62.4          | 251.7         | 75.1             | 2.29                  | 2.50        | 1.77        |
| 5             | F           | 95            | 0.024                                 | 0.026        | 0.6                                    | 0.54        | 60.9                                    | 50.5          | 111.4         | 54.6             | 3.95                  | 3.75        | 3.89        |
| 6             | F           | 57            | 0.025                                 | 0.03         | 0.62                                   | 0.55        | 81.1                                    | 48.2          | 129.3         | 62.7             | 3.63                  | 3.59        | 3.07        |
| 7             | M           | 178           | 0.041                                 | 0.049        | 0.47                                   | 0.38        | 133.8                                   | 78.5          | 212.3         | 63.0             | 3.67                  | 2.56        | 2.01        |
| 8             | F           | 73            | 0.024                                 | 0.027        | 0.62                                   | 0.57        | 61.5                                    | 52.8          | 114.3         | 53.8             | 3.16                  | 3.71        | 3.32        |
| 9             | F           | 79            | 0.035                                 | 0.04         | 0.56                                   | 0.52        | 103.4                                   | 72.0          | 175.4         | 58.9             | 3.28                  | 2.96        | 2.57        |
| 10            | F           | 113           | 0.023                                 | 0.029        | 0.68                                   | 0.58        | 81.5                                    | 40.0          | 121.5         | 67.1             | 5.23                  | 4.00        | 3.24        |
| <b>Male</b>   | <b>Mean</b> | <b>110.8</b>  | <b>0.035</b>                          | <b>0.045</b> | <b>0.54</b>                            | <b>0.45</b> | <b>131.8</b>                            | <b>60.6</b>   | <b>192.4</b>  | <b>68.2</b>      | <b>3.33</b>           | <b>2.95</b> | <b>2.32</b> |
|               | SD          | 38.2          | 0.007                                 | 0.009        | 0.06                                   | 0.07        | 34.0                                    | 13.1          | 40.8          | 5.0              | 0.60                  | 0.44        | 0.45        |
| <b>Female</b> | <b>Mean</b> | <b>83.4</b>   | <b>0.026</b>                          | <b>0.030</b> | <b>0.62</b>                            | <b>0.55</b> | <b>77.7</b>                             | <b>52.7</b>   | <b>130.4</b>  | <b>59.4</b>      | <b>3.85</b>           | <b>3.60</b> | <b>3.22</b> |
|               | SD          | 21.4          | 0.005                                 | 0.006        | 0.04                                   | 0.02        | 17.5                                    | 11.8          | 26.1          | 5.6              | 0.83                  | 0.39        | 0.48        |
| <b>All</b>    | <b>Mean</b> | <b>97.1</b>   | <b>0.031</b>                          | <b>0.038</b> | <b>0.58</b>                            | <b>0.50</b> | <b>104.7</b>                            | <b>56.6</b>   | <b>161.4</b>  | <b>63.8</b>      | <b>3.59</b>           | <b>3.28</b> | <b>2.77</b> |
|               | SD          | 32.6          | 0.007                                 | 0.011        | 0.07                                   | 0.07        | 38.28                                   | 12.48         | 46.0          | 6.80             | 0.74                  | 0.52        | 0.64        |

**Table S2:** Summary of amplitude, phase,  $\mu_a$ ,  $\mu_s'$ , and DPF changes during the sustained flexion.

|                |             | Sustained Flexion Changes |              |             |             |                              |              |                               |               |              |              |
|----------------|-------------|---------------------------|--------------|-------------|-------------|------------------------------|--------------|-------------------------------|---------------|--------------|--------------|
|                |             | Amplitude (%)             |              | Phase (deg) |             | $\mu_a$ ( $\text{mm}^{-1}$ ) |              | $\mu_s'$ ( $\text{mm}^{-1}$ ) |               | DPF          |              |
|                |             | 730 nm                    | 850 nm       | 730 nm      | 850 nm      | 730 nm                       | 850 nm       | 730 nm                        | 850 nm        | 730 nm       | 850 nm       |
| <b>Males</b>   | <b>Mean</b> | <b>-62.1</b>              | <b>-19.0</b> | <b>-4.5</b> | <b>-0.4</b> | <b>0.025</b>                 | <b>0.003</b> | <b>-0.090</b>                 | <b>-0.037</b> | <b>-0.84</b> | <b>-0.23</b> |
|                | SD          | 12.2                      | 14.5         | 0.7         | 0.3         | 0.010                        | 0.002        | 0.025                         | 0.126         | 0.42         | 0.57         |
| <b>Females</b> | <b>Mean</b> | <b>-45.7</b>              | <b>-14.7</b> | <b>-3.1</b> | <b>-0.8</b> | <b>0.011</b>                 | <b>0.003</b> | <b>-0.036</b>                 | <b>-0.008</b> | <b>-0.56</b> | <b>-0.15</b> |
|                | SD          | 13.2                      | 21.6         | 1.5         | 0.8         | 0.008                        | 0.002        | 0.045                         | 0.032         | 0.29         | 0.12         |
| <b>All</b>     | <b>Mean</b> | <b>-53.9</b>              | <b>-16.9</b> | <b>-3.8</b> | <b>-0.6</b> | <b>0.018</b>                 | <b>0.003</b> | <b>-0.063</b>                 | <b>-0.023</b> | <b>-0.70</b> | <b>-0.19</b> |
|                | SD          | 15.0                      | 18.0         | 1.4         | 0.6         | 0.012                        | 0.002        | 0.045                         | 0.091         | 0.26         | 0.39         |

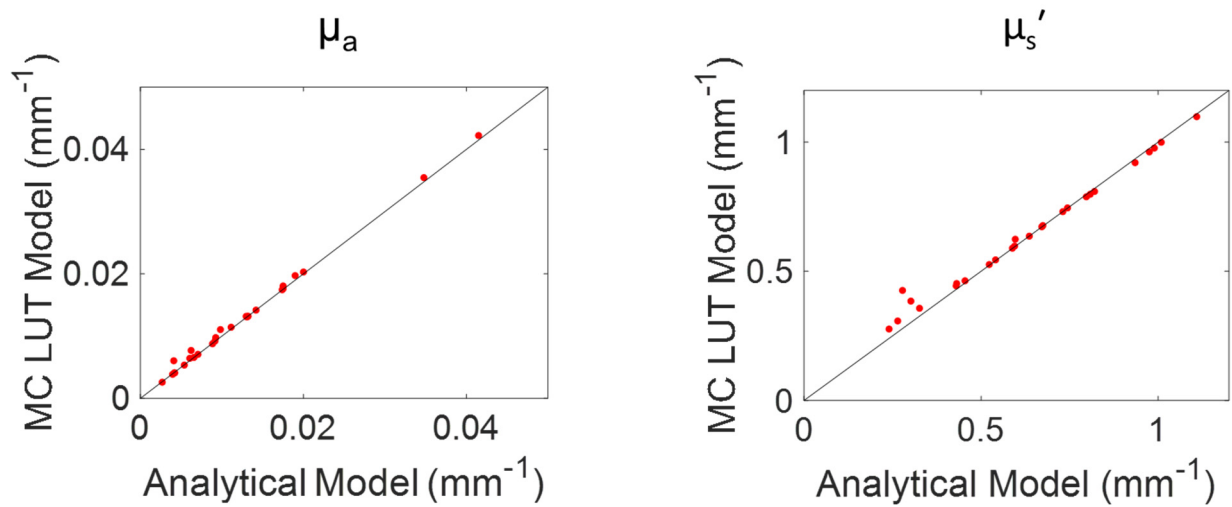

**Figure S1:** Validation of the MC LUT model was performed by comparing the absorption and reduced scattering extractions from the LUT against the traditional analytical model. 13 different silicone optical phantoms with optical properties similar to the neck were measured at 2 different wavelengths (730 and 850 nm). The average of 20 measurements for each phantom was reported. The percent difference between these two methods was 4.8% and 5.7% for absorption and reduced scattering respectively. The black line in the plots is the identity line.

### Intermittent Flexion

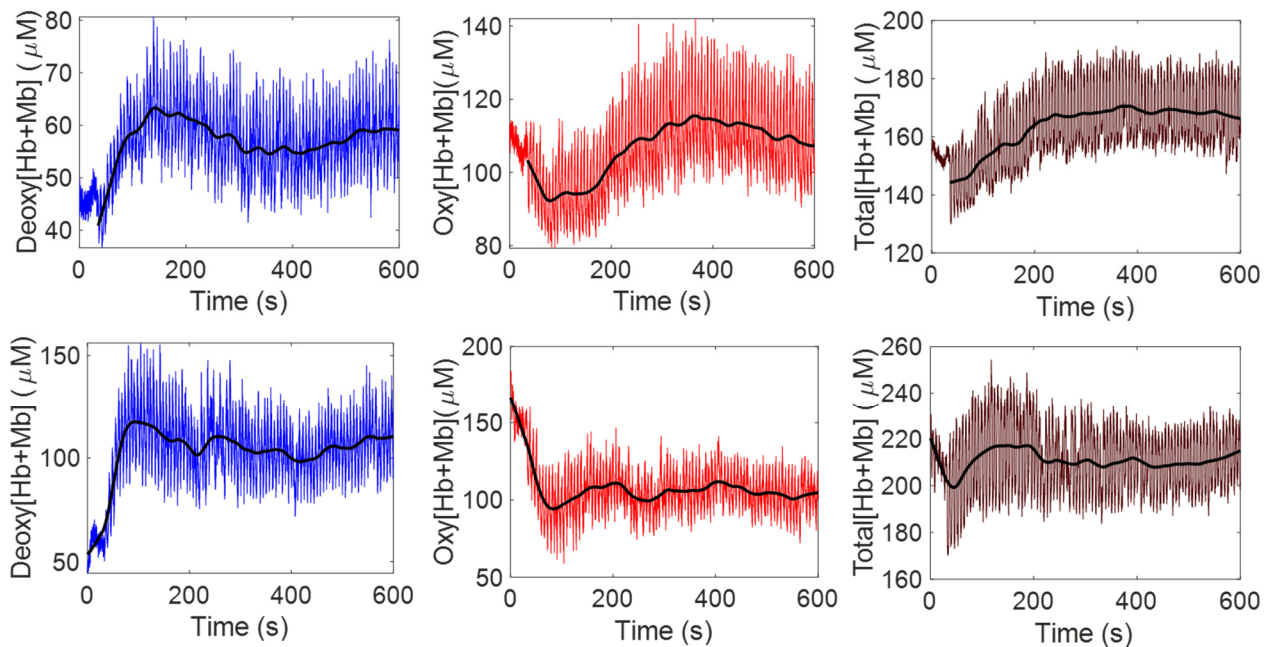

**Figure S2:** Sample intermittent flexion from two different subjects (subject 1 and 2 top row and bottom row respectively). These samples highlight some of the variation in changes observed from subject to subject. Most notably, in the first subject (top row), oxy[Hb+Mb] had a large rebound (increase) after its local minimum resulting in a more sustained increase in total[Hb+Mb], compared to the second subject (bottom row) which had a smaller increase in oxy[Hb+Mb] resulting in a slight decrease in total[Hb+Mb] following the local maximum.
